# Supplementary material for: Role of Tim17 in coupling the import motor to the translocation channel of the mitochondrial presequence translocase
Source: eLife journal article supplement (doi:10.7554/elife.22696), 2017-02-06

- impaired Tim23 interaction
- impaired Tim44 interaction
- GxxxG mutants with normal growth

IMS

MIM

Matrix

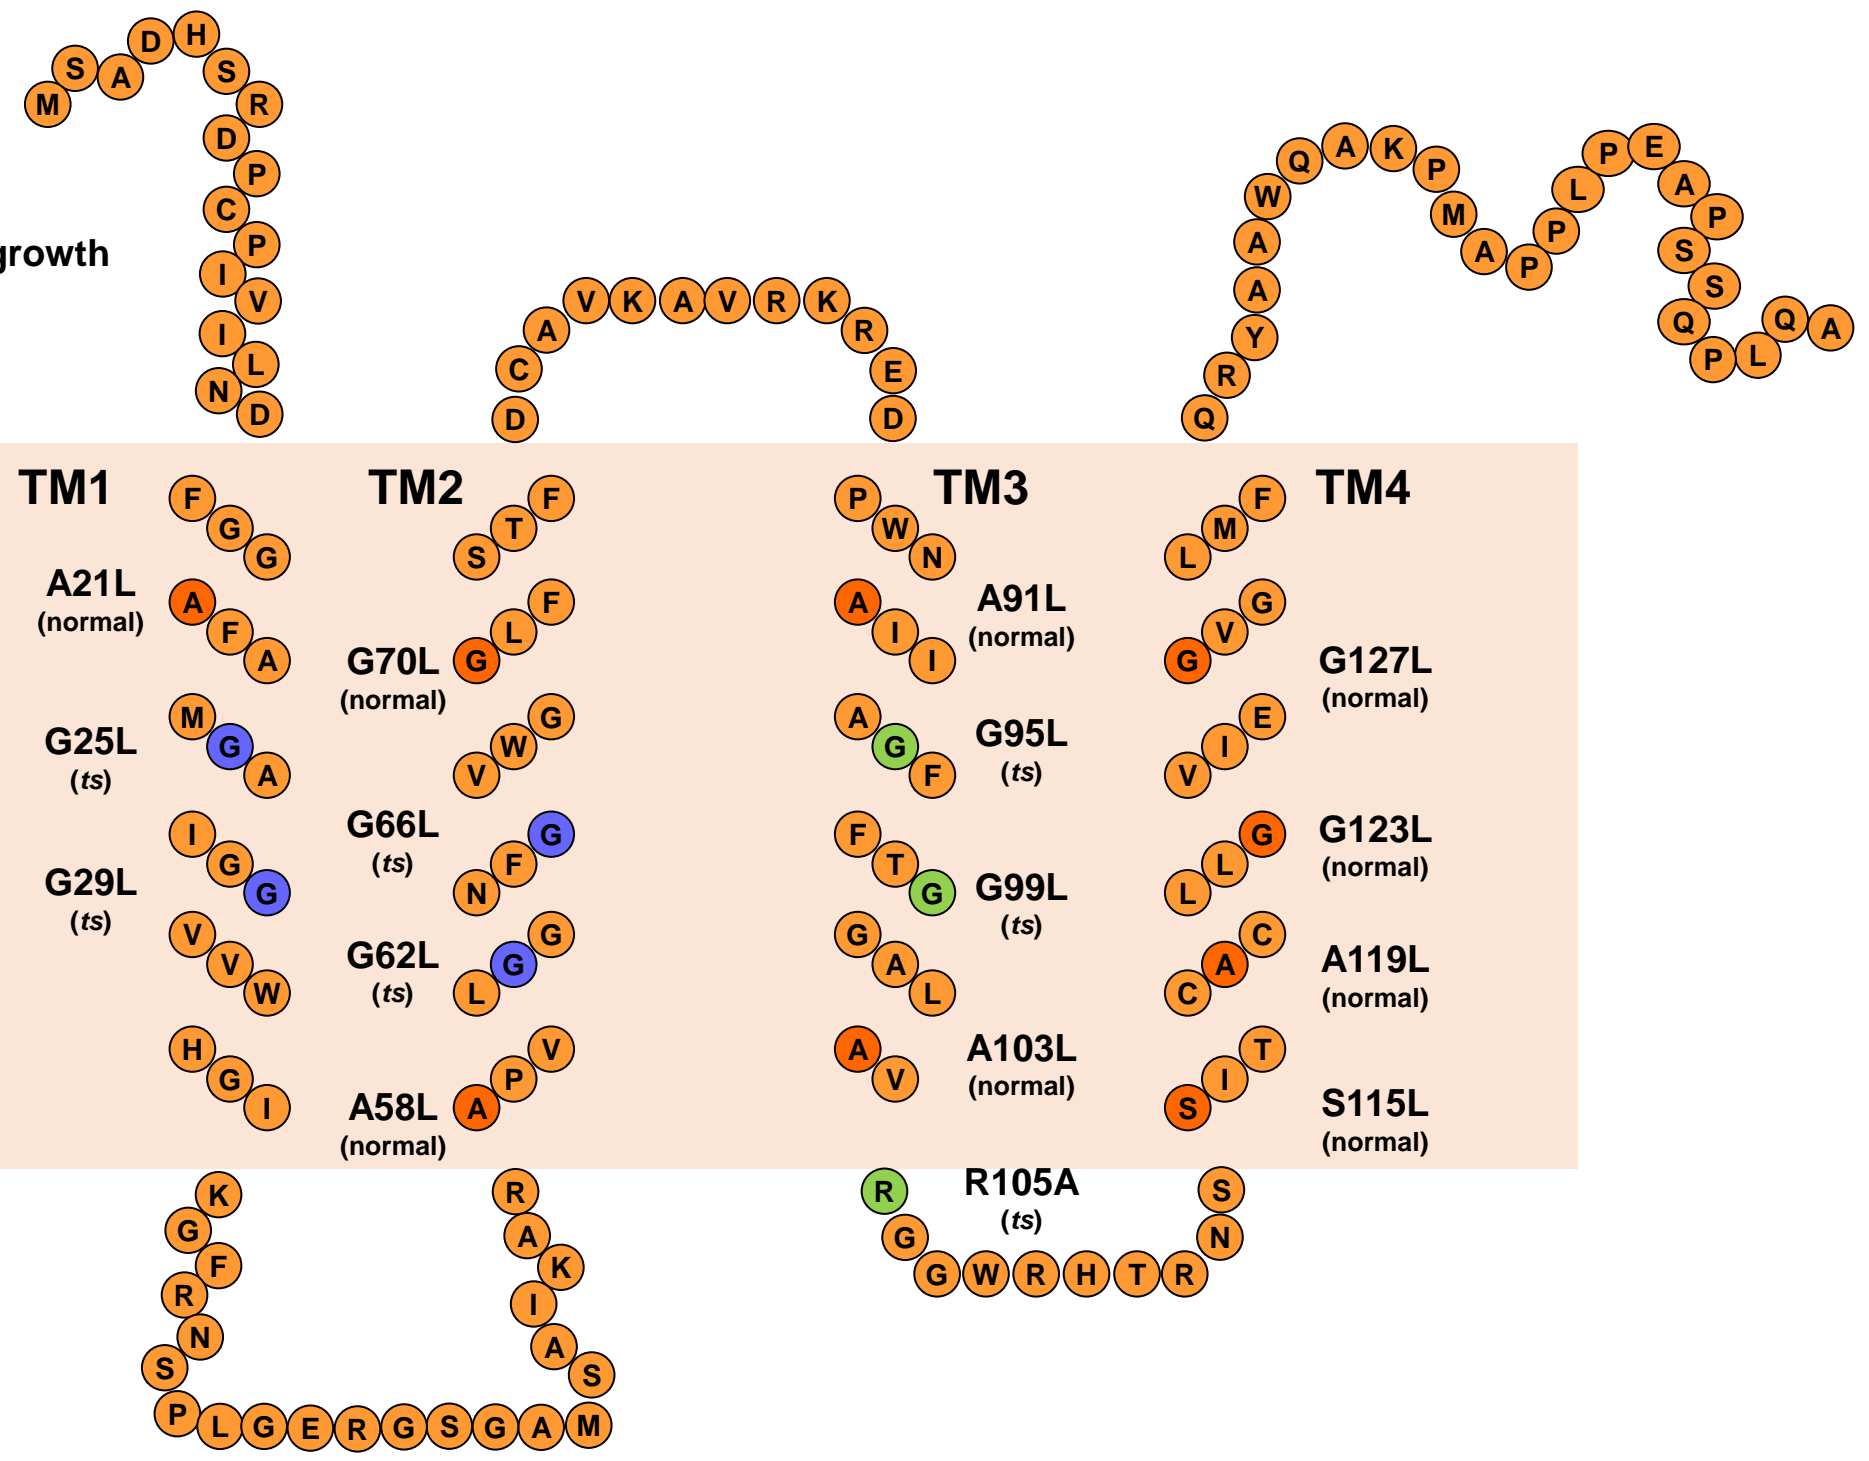

Supplement: supp [file elife_poa_e22696_Figure_4_Figure_Supplement_1.pdf › elife_poa_e22696_Figure_4_Figure_Supplement_1.pdf]
