# Supplementary figures and images for: Role of Tim17 in coupling the import motor to the translocation channel of the mitochondrial presequence translocase
Source: eLife journal article supplement (doi:10.7554/elife.22696), 2017-02-06

**A**

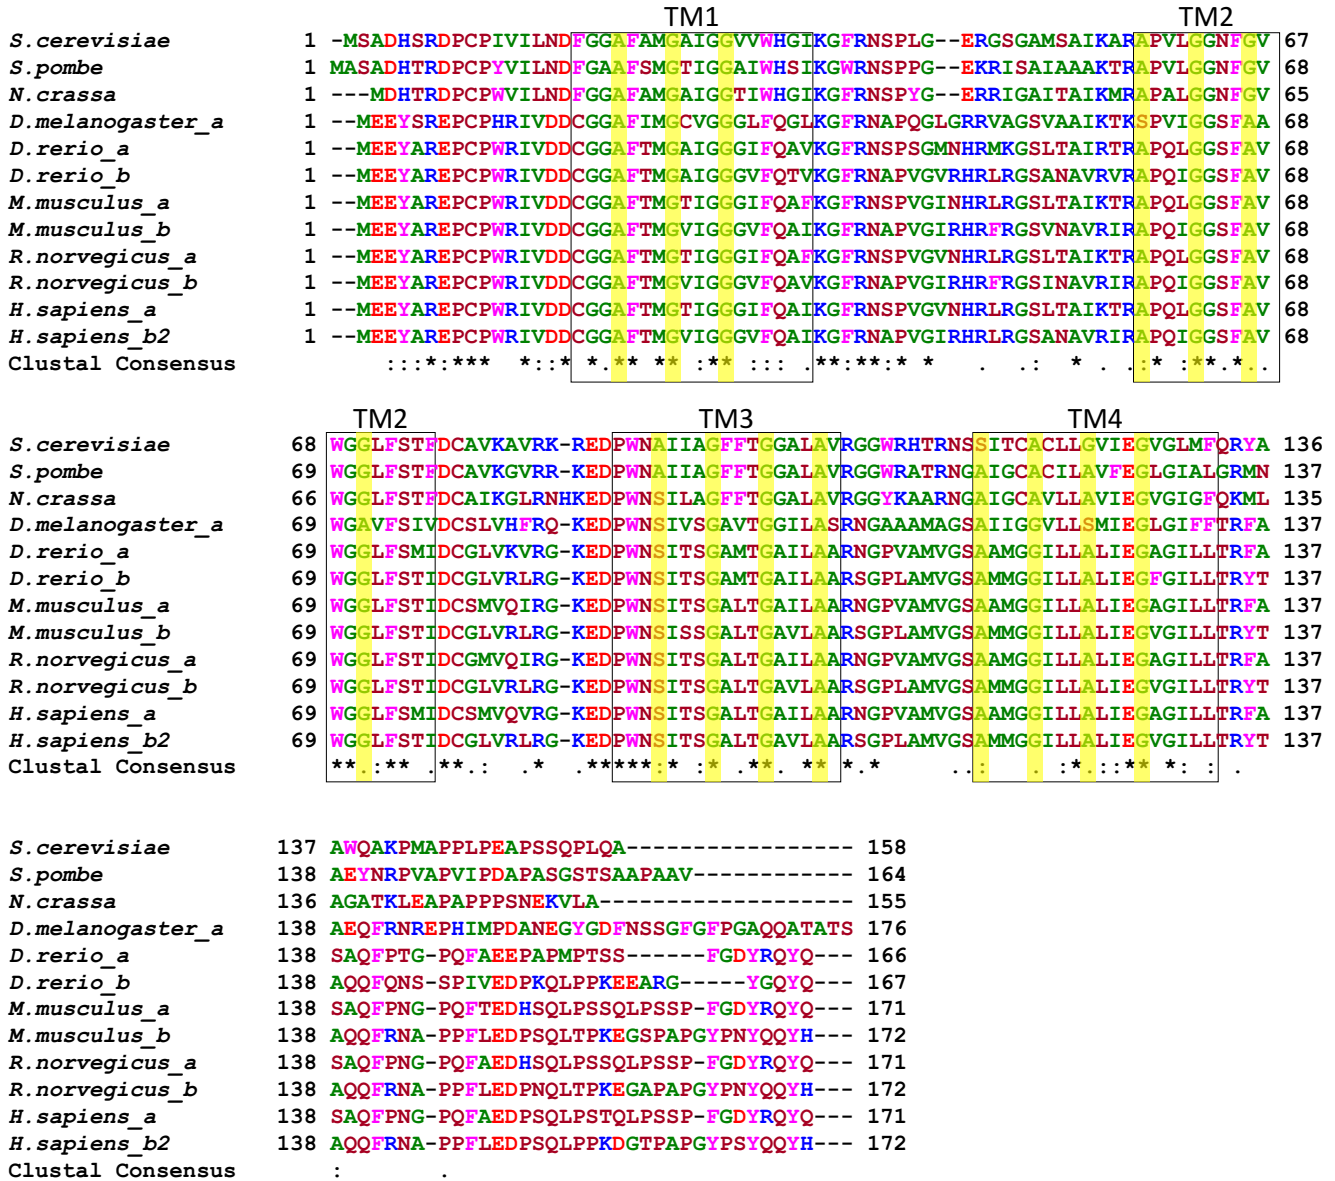

**B**

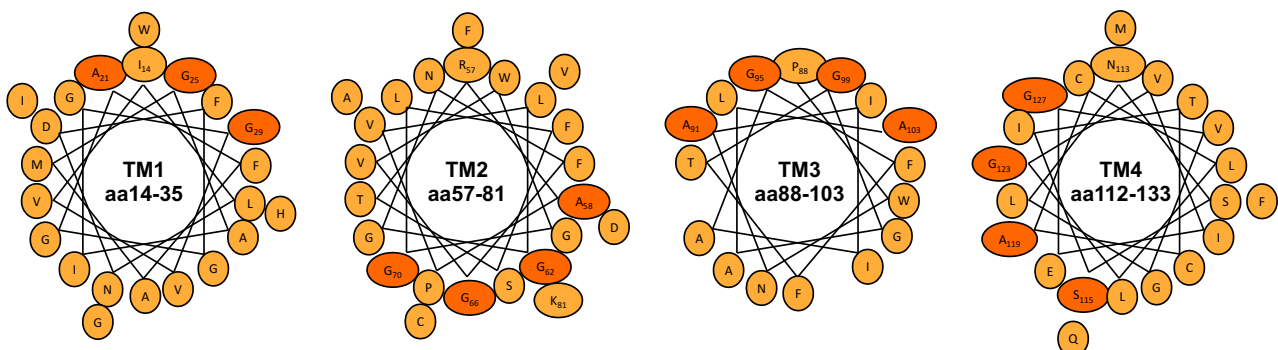

Figure 1 - figure supplement 1. Demishtein-Zohary et al.

Supplement: supp [file elife_poa_e22696_Figure_1_Figure_Supplement_1.pdf › elife_poa_e22696_Figure_1_Figure_Supplement_1.pdf]

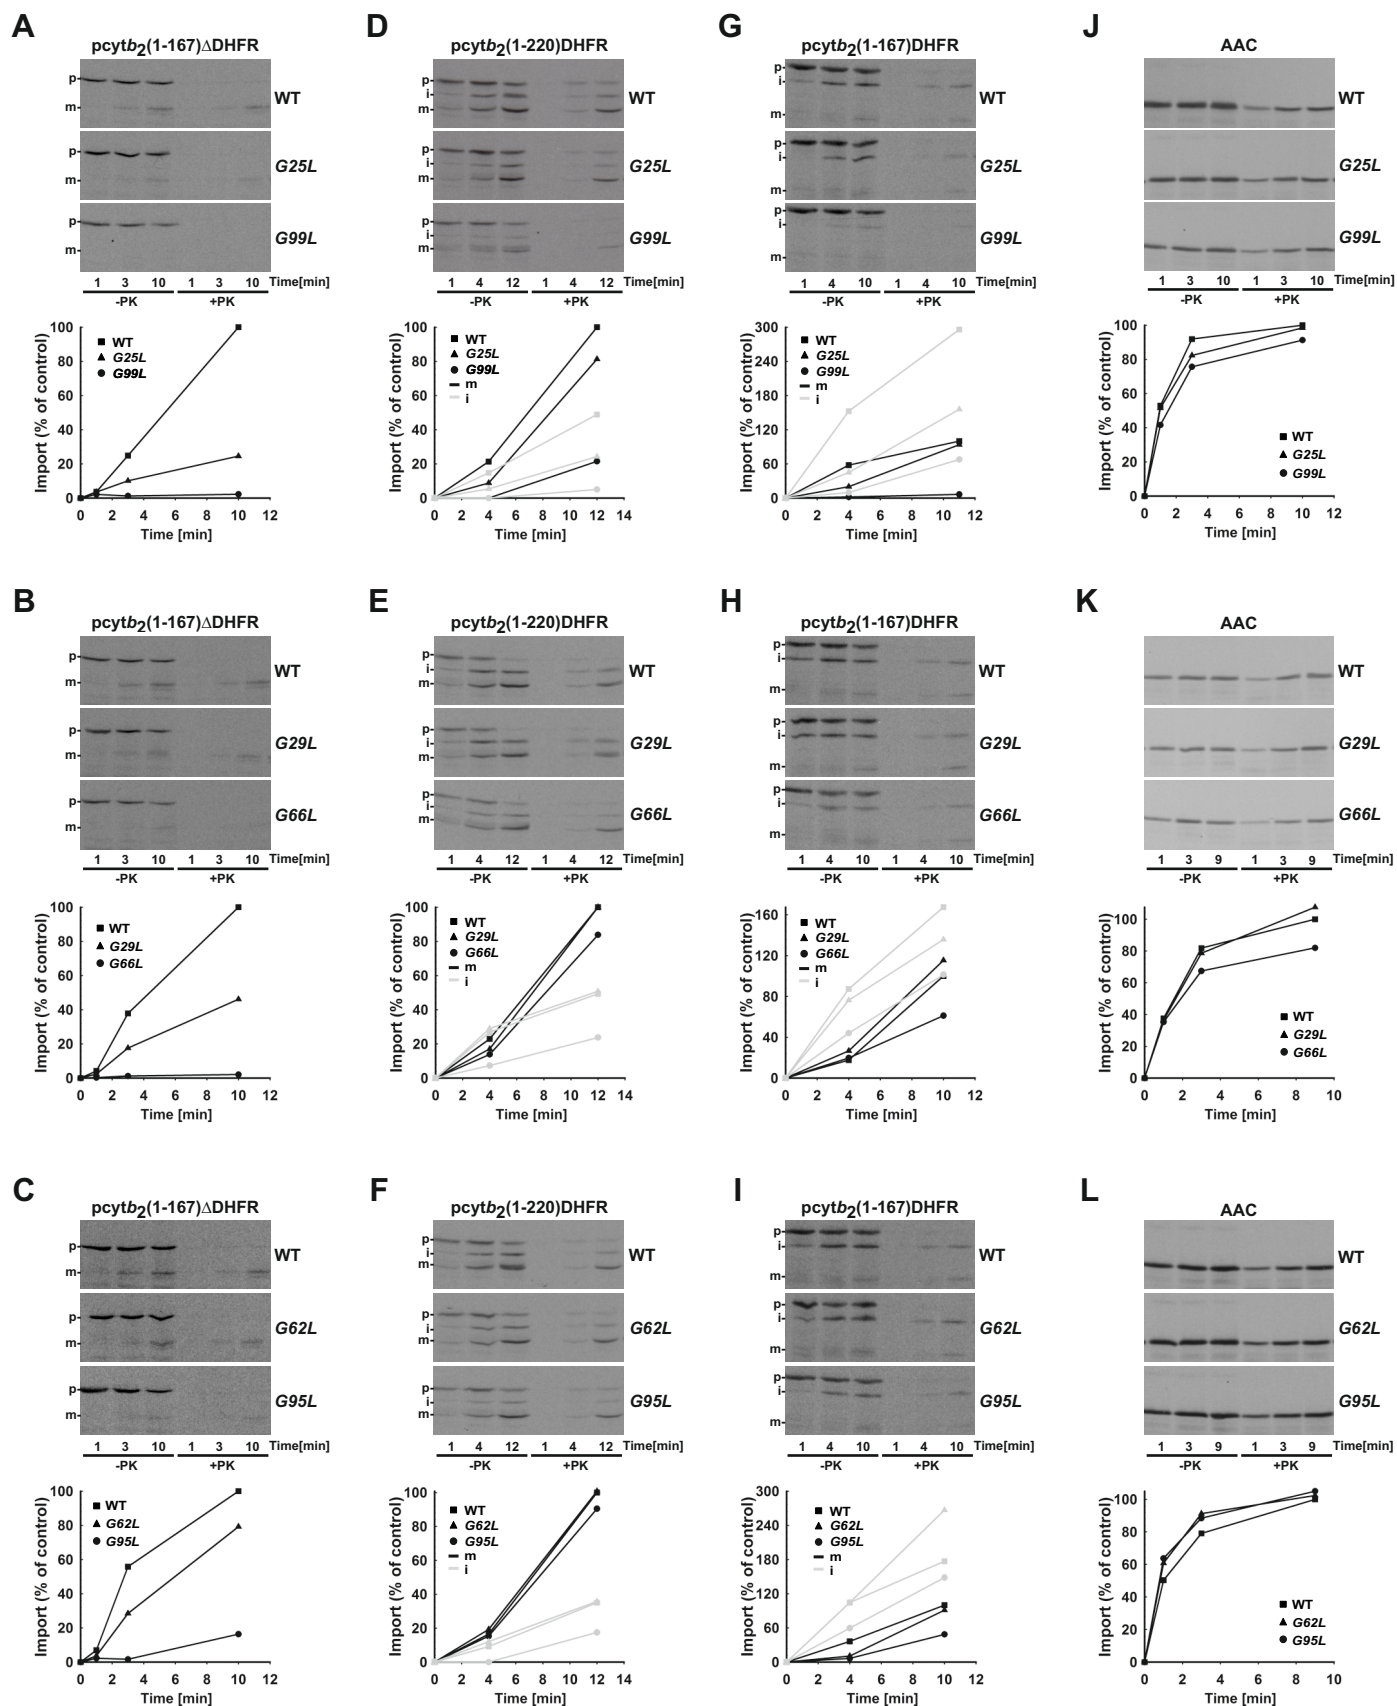

Figure 2 - figure supplement 1. Demishtein-Zohary et al.

Supplement: supp [file elife_poa_e22696_Figure_2_Figure_Supplement_1.pdf › elife_poa_e22696_Figure_2_Figure_Supplement_1.pdf]

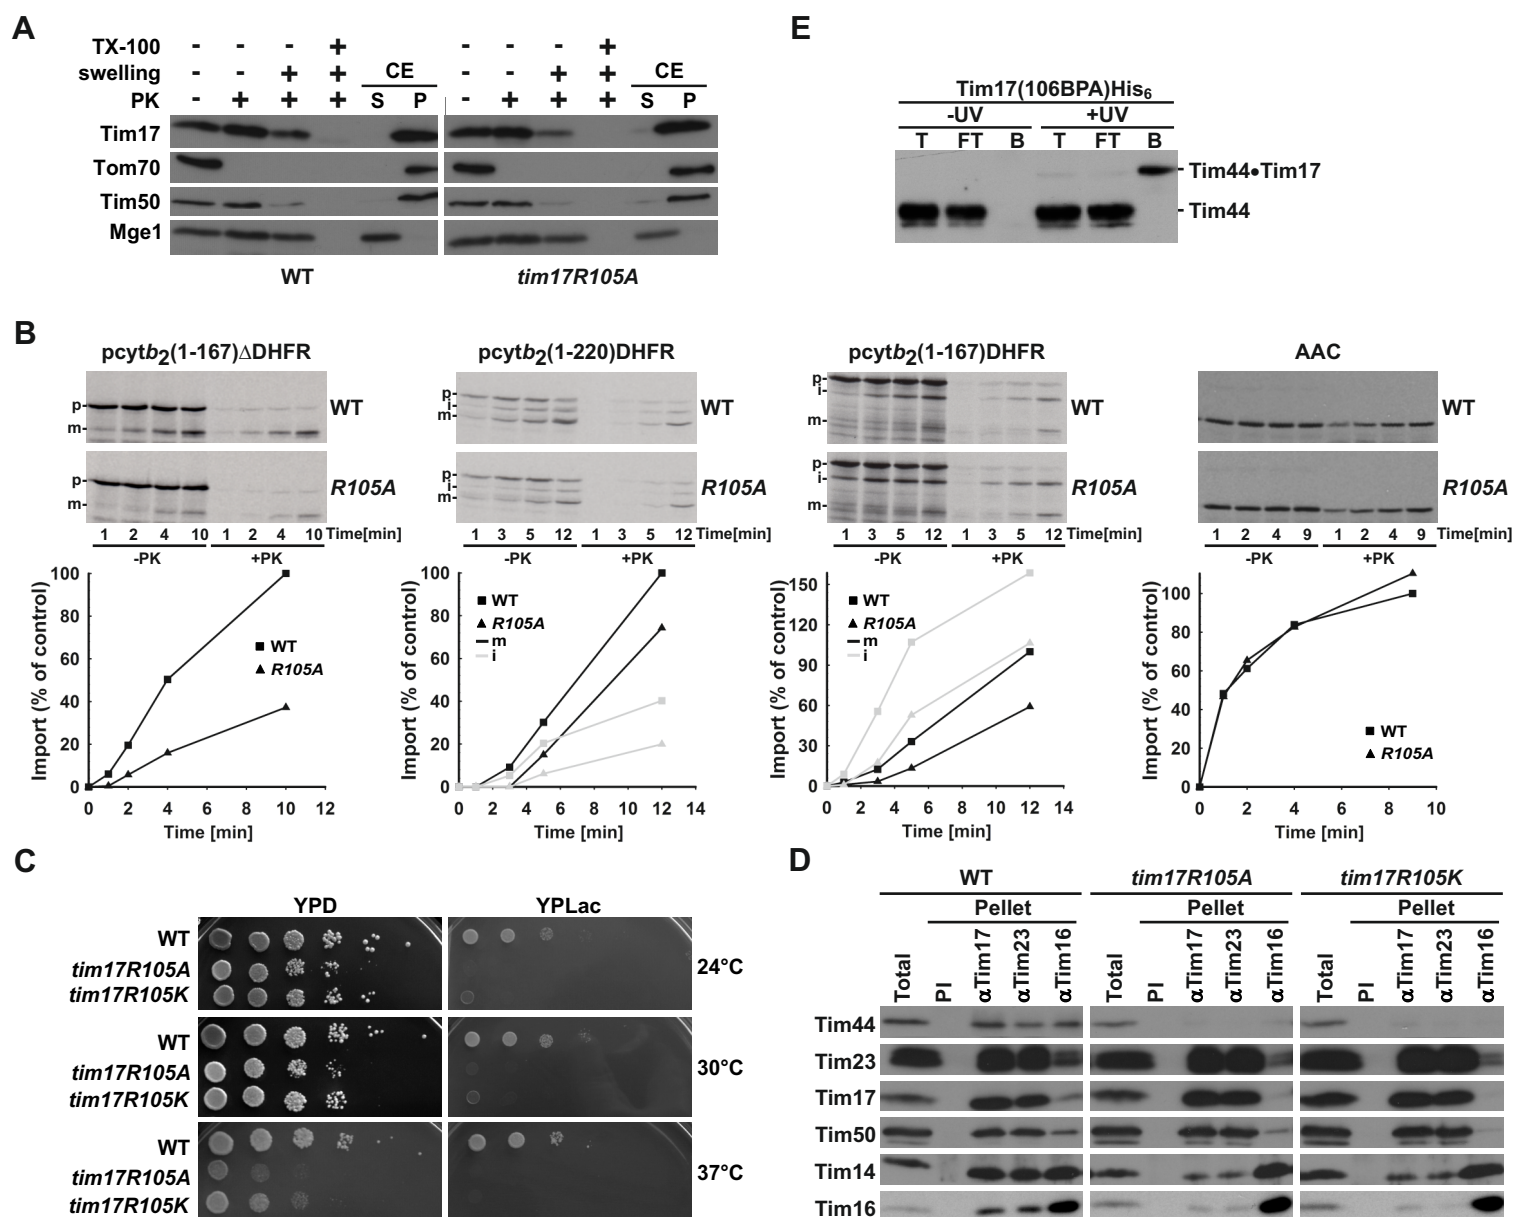

Figure 3 - figure supplement 1. Demishtein-Zohary et al.

Supplement: supp [file elife_poa_e22696_Figure_3_Figure_Supplement_1.pdf › elife_poa_e22696_Figure_3_Figure_Supplement_1.pdf]
